# Supplementary material for: Tracking performance and disturbance in decentralized wastewater treatment systems with fluorescence spectroscopy
Source: Royal Society of Chemistry journal article supplement (doi:10.1039/d3ew00671a), 2024-01-01
Supplement: d3ew00671a1.pdf [file d3ew00671a1.pdf]

## Supplementary Material

### Tracking performance and disturbance in decentralized wastewater treatment systems with fluorescence spectroscopy

Natalie Mladenov<sup>1,\*</sup>, Scott Sanfilippo<sup>1</sup>, Laura Panduro<sup>1</sup>, Chelsi Pascua<sup>1</sup>, Armando Arteaga<sup>2</sup>,  
Bjoern Pietruschka<sup>3</sup>

<sup>1</sup> Department of Civil, Construction, and Environmental Engineering, San Diego State University, San Diego, CA, 92182, USA

<sup>2</sup> Departamento de Estudios Urbanos y del Medio Ambiente, El Colegio de la Frontera Norte, Tijuana 22560, Mexico

<sup>3</sup> WASH R&D Centre, University of KwaZulu-Natal, Durban, South Africa

\* Author to whom correspondence should be addressed.

Supplementary Tables: 6

Supplementary Figures: 7

## Supplementary Tables

**Table S1.** Formulation of synthetic wastewater used as feed for lab-scale ABR.

| Ingredient          | Mass (g in 40L of tap water) |
|---------------------|------------------------------|
| Milk powder         | 10                           |
| Sodium acetate      | 10                           |
| Potassium phosphate | 4                            |
| Meat extract        | 4                            |
| Yeast extract       | 4                            |
| NH <sub>4</sub> Cl  | 2                            |
| Boric Acid          | 0.035                        |
| CuSO <sub>4</sub>   | 0.032                        |
| ZnCl <sub>2</sub>   | 0.01                         |
| CoCl <sub>2</sub>   | 0.0006                       |

**Table S2.** Typical values (means  $\pm$  standard deviations) of COD concentration, fluorescence index (FI), freshness index (FrI), humification index (HIX), and fluorescent peaks A, B, T, C, and M in influent and effluent of lab-scale and community decentralized wastewater treatment systems.

| Type of wastewater                 | Treatment type                                | N  | Location | Mean values |            |            |            |             |             |             |             |             |
|------------------------------------|-----------------------------------------------|----|----------|-------------|------------|------------|------------|-------------|-------------|-------------|-------------|-------------|
|                                    |                                               |    |          | COD (mg/L)  | FI         | FrI        | HIX        | Peak A (RU) | Peak B (RU) | Peak T (RU) | Peak C (RU) | Peak M (RU) |
| Domestic WW, South Africa          | Community ABR before scum accumulated (2015)  | 8  | Influent | 488         | 2.38       | 0.69       | 0.85       | 7.92        | 14.98       | 16.53       | 6.30        | 8.75        |
|                                    |                                               |    |          | $\pm 107$   | $\pm 0.06$ | $\pm 0.04$ | $\pm 0.07$ | $\pm 0.76$  | $\pm 1.84$  | $\pm 1.58$  | $\pm 0.55$  | $\pm 1.43$  |
|                                    |                                               |    | Effluent | 212         | 2.51       | 0.66       | 1.52       | 4.77        | 4.68        | 6.46        | 5.69        | 6.39        |
|                                    |                                               |    |          | $\pm 50$    | $\pm 0.02$ | $\pm 0.11$ | $\pm 0.16$ | $\pm 0.40$  | $\pm 0.57$  | $\pm 0.63$  | $\pm 0.35$  | $\pm 1.99$  |
| “Dairy-like” synthetic wastewater  | Lab ABR during normal operation w/scum (2017) | 10 | Influent | 544         | 1.81       | 1.13       | 1.19       | 11.8        | 17.7        | 23.2        | 5.38        | 3.35        |
|                                    |                                               |    |          | $\pm 106$   | $\pm 0.39$ | $\pm 0.14$ | $\pm 0.24$ | $\pm 3.05$  | $\pm 2.04$  | $\pm 1.45$  | $\pm 1.49$  | $\pm 1.25$  |
|                                    |                                               |    | Effluent | 178         | 2.61       | 0.87       | 4.51       | 5.26        | 1.49        | 2.28        | 1.97        | 1.19        |
|                                    |                                               |    |          | $\pm 86$    | $\pm 0.06$ | $\pm 0.04$ | $\pm 0.89$ | $\pm 1.66$  | $\pm 0.21$  | $\pm 0.62$  | $\pm 0.54$  | $\pm 0.15$  |
| “Dairy-like” synthetic wastewater  | Lab ABR during normal operation w/scum (2018) | 6  | Influent | 540         | 2.11       | 0.99       | 1.37       | 11.9        | 16.1        | 23.7        | 4.78        | 2.27        |
|                                    |                                               |    |          | $\pm 212$   | $\pm 0.37$ | $\pm 0.27$ | $\pm 1.17$ | $\pm 6.21$  | $\pm 7.96$  | $\pm 11.8$  | $\pm 3.63$  | $\pm 1.19$  |
|                                    |                                               |    | Effluent | 175         | 2.49       | 0.87       | 2.12       | 6.29        | 10.8        | 9.77        | 1.96        | 1.15        |
|                                    |                                               |    |          | $\pm 79$    | $\pm 0.06$ | $\pm 0.18$ | $\pm 2.34$ | $\pm 1.90$  | $\pm 8.11$  | $\pm 5.71$  | $\pm 0.84$  | $\pm 0.22$  |
| Real, domestic wastewater, USA     | Lab ABR (2018)                                | 3  | Influent | 358         | 1.92       | 0.89       | 0.90       | 5.95        | 7.77        | 9.13        | 2.68        | 4.23        |
|                                    |                                               |    |          | $\pm 20.8$  | $\pm 0.04$ | $\pm 0.02$ | $\pm 0.01$ | $\pm 2.46$  | $\pm 2.19$  | $\pm 3.07$  | $\pm 0.91$  | $\pm 1.68$  |
|                                    |                                               |    | Effluent | 135         | 1.90       | 0.96       | 1.71       | 2.61        | 1.89        | 3.16        | 1.84        | 2.22        |
|                                    |                                               |    |          | $\pm 19.7$  | $\pm 0.02$ | $\pm 0.02$ | $\pm 0.13$ | $\pm 0.39$  | $\pm 0.39$  | $\pm 0.49$  | $\pm 0.28$  | $\pm 0.32$  |
|                                    | Lab ASB (2018)                                | 3  | Influent | 358         | 1.92       | 0.89       | 0.90       | 5.95        | 7.77        | 9.13        | 2.68        | 4.23        |
|                                    |                                               |    |          | $\pm 20.8$  | $\pm 0.04$ | $\pm 0.02$ | $\pm 0.01$ | $\pm 2.46$  | $\pm 2.19$  | $\pm 3.07$  | $\pm 0.91$  | $\pm 1.68$  |
|                                    |                                               |    | Effluent | 91.1        | 1.98       | 1.03       | 2.72       | 3.17        | 1.85        | 2.94        | 2.47        | 2.69        |
|                                    |                                               |    |          | $\pm 26.3$  | $\pm 0.02$ | $\pm 0.04$ | $\pm 0.80$ | $\pm 1.30$  | $\pm 1.55$  | $\pm 2.32$  | $\pm 0.87$  | $\pm 1.12$  |
| Real, domestic wastewater, Mexico* | Bio-trickling filter (2019-2020)              | 5  | Influent | 880         | 2.15       | 0.77       | 0.63       | 12.99       | -           | 23.00       | 7.00        | 8.21        |
|                                    |                                               |    |          | $\pm 13.4$  | $\pm 0.13$ | $\pm 0.06$ | $\pm 0.10$ | $\pm 4.64$  | -           | $\pm 7.94$  | $\pm 2.16$  | $\pm 2.54$  |
|                                    |                                               |    | Effluent | 363         | 2.26       | 0.78       | 1.38       | 4.29        | -           | 6.44        | 4.99        | 4.19        |
|                                    |                                               |    |          | $\pm 12.7$  | $\pm 0.06$ | $\pm 0.03$ | $\pm 0.12$ | $\pm 0.96$  | -           | $\pm 1.30$  | $\pm 1.13$  | $\pm 0.94$  |

\* Dash indicates that Peak B was measured but not recorded.

**Table S3.** Bivariate correlation of change in fluorescence metric with COD removal ( $R^2$ ) for systems described in Table S1.

| <b>Correlated with:</b>    | <b>Fluorescence metric</b> |                 |                    |        |        |        |        |        |
|----------------------------|----------------------------|-----------------|--------------------|--------|--------|--------|--------|--------|
|                            | Fluorescence Index         | Freshness Index | Humification Index | Peak A | Peak B | Peak T | Peak C | Peak M |
| % COD removal              | 0.02                       | 0.34            | 0.35               | 0.64*  | 0.57*  | 0.70*  | 0.27   | 0.47   |
| Slope of linear regression | -0.14                      | -0.42           | -4.1               | 1.1    | 1.0    | 1.1    | 0.68   | 0.73   |

\* Indicates significance ( $p < 0.05$ )

**Table S4.** Fluorescence characteristics of the 128 samples used in the PARAFAC model.

| PARAFAC Sample Number | Removed (X = Yes) | Fluorescence Index | Freshness Index | Humification Index | Peak A (RU) | Peak B (RU) | Peak T (RU) | Peak C (RU) | Peak M (RU) |
|-----------------------|-------------------|--------------------|-----------------|--------------------|-------------|-------------|-------------|-------------|-------------|
| 1                     |                   | 2.364157           | 0.587338        | 0.374433           | 5.309359    | 14.006796   | 10.584588   | 7.50196     | 6.260164    |
| 2                     |                   | 2.332106           | 0.649745        | 0.368787           | 5.216455    | 14.242334   | 10.23332    | 6.61263     | 5.659682    |
| 3                     |                   | 2.281156           | 0.67795         | 0.402496           | 4.533004    | 12.958853   | 10.613102   | 5.668062    | 4.968852    |
| 4                     |                   | 2.326737           | 0.628695        | 0.48268            | 4.925867    | 11.060976   | 10.202393   | 6.617527    | 5.843256    |
| 5                     |                   | 2.172866           | 0.621801        | 0.541166           | 5.386169    | 11.454912   | 10.686435   | 7.003977    | 6.110025    |
| 6                     |                   | 1.865252           | 0.913931        | 0.763105           | 4.035002    | 7.226133    | 9.500305    | 3.21641     | 4.260643    |
| 7                     |                   | 2.26865            | 0.605979        | 0.919093           | 3.915464    | 6.206565    | 8.874497    | 7.029876    | 6.762402    |
| 8                     |                   | 2.373714           | 0.572593        | 1.212909           | 4.147463    | 4.635138    | 7.354903    | 7.708642    | 6.962455    |
| 9                     |                   | 2.371558           | 0.591438        | 1.11624            | 4.82597     | 7.644718    | 10.805589   | 6.990111    | 5.959925    |
| 10                    |                   | 2.224178           | 0.632208        | 1.208612           | 4.795865    | 6.84959     | 9.428714    | 6.38558     | 5.712442    |
| 11                    |                   | 2.104202           | 0.655138        | 1.170493           | 4.765118    | 6.549198    | 9.490301    | 5.698737    | 5.700441    |
| 12                    |                   | 2.253906           | 0.621602        | 1.179891           | 4.10635     | 5.821001    | 8.219659    | 5.693942    | 5.14321     |
| 13                    |                   | 2.2163             | 0.646926        | 1.196729           | 4.541696    | 6.308493    | 9.17921     | 6.213201    | 5.334567    |
| 14                    |                   | 1.960395           | 0.87305         | 0.557357           | 4.532712    | 14.773052   | 17.362002   | 4.190106    | 4.916179    |
| 15                    |                   | 2.368902           | 0.599016        | 1.591477           | 5.141689    | 4.96269     | 7.378734    | 7.414031    | 6.515373    |
| 16                    | X                 | 2.710987           | 0.613157        | 11.921987          | 13.219234   | 1.304901    | 1.988563    | 4.376125    | 1.559631    |
| 17                    |                   | 2.63711            | 0.832241        | 4.264304           | 3.549235    | 1.258609    | 1.654715    | 1.398982    | 1.02532     |
| 18                    |                   | 2.669887           | 0.850606        | 3.784597           | 7.616676    | 2.875893    | 3.837556    | 2.461576    | 1.393387    |
| 19                    |                   | 2.504814           | 0.88298         | 2.342458           | 3.542927    | 1.963571    | 2.823933    | 1.343258    | 0.994443    |
| 20                    |                   | 2.341815           | 0.632676        | 11.011255          | 13.392175   | 1.614563    | 2.497353    | 5.927564    | 1.936993    |
| 21                    |                   | 2.669402           | 0.915451        | 3.937162           | 3.917328    | 1.365505    | 1.764564    | 1.538683    | 1.123682    |
| 22                    |                   | 2.546334           | 0.99519         | 0.613724           | 6.010465    | 10.240261   | 16.747037   | 1.858967    | 1.633805    |
| 23                    |                   | 2.434462           | 0.675045        | 3.029043           | 9.845128    | 3.935407    | 6.304788    | 3.487216    | 1.374621    |
| 24                    |                   | 2.261285           | 0.613411        | 10.09103           | 14.041069   | 1.928079    | 2.830691    | 5.911844    | 1.893541    |
| 25                    |                   | 2.649729           | 0.876746        | 4.26853            | 3.938463    | 1.285916    | 1.839032    | 1.523092    | 1.022207    |
| 26                    |                   | 2.507671           | 1.097195        | 0.522606           | 4.533643    | 17.548402   | 14.427371   | 1.483703    | 1.277987    |
| 27                    |                   | 2.561596           | 0.647344        | 6.390759           | 6.742388    | 1.357136    | 2.008761    | 2.243327    | 0.813136    |
| 28                    | X                 | 1.818008           | 0.760535        | 4.343565           | 23.405802   | 10.295947   | 10.134295   | 10.017119   | 3.35814     |
| 29                    |                   | 2.546739           | 0.879588        | 3.998524           | 5.828677    | 1.765893    | 3.097248    | 2.172317    | 1.325067    |
| 30                    |                   | 2.516578           | 0.890295        | 1.924416           | 5.429883    | 5.328166    | 5.93145     | 1.939217    | 1.350611    |
| 31                    |                   | 2.499348           | 0.871169        | 0.396401           | 5.120412    | 17.688376   | 15.011388   | 1.255464    | 1.013625    |
| 32                    | X                 | 2.347529           | 0.976954        | 0.873953           | 5.214089    | 19.128324   | 11.387528   | 2.237058    | 1.862789    |
| 33                    |                   | 2.570157           | 0.823113        | 5.816329           | 7.351684    | 1.538786    | 2.399884    | 2.635369    | 1.305865    |
| 34                    |                   | 2.401462           | 1.028437        | 0.45613            | 6.04835     | 19.12711    | 14.936745   | 1.356513    | 1.09218     |
| 35                    | X                 | 1.985935           | 0.706602        | 6.169843           | 9.039181    | 2.971083    | 3.506315    | 9.631375    | 3.219011    |
| 36                    |                   | 2.368713           | 1.067088        | 0.855241           | 9.247198    | 14.830342   | 23.790049   | 4.413213    | 5.146223    |
| 37                    |                   | 2.081997           | 1.118134        | 0.392573           | 6.924946    | 19.438937   | 26.405749   | 2.002864    | 2.507774    |
| 38                    |                   | 2.208859           | 0.818577        | 1.464974           | 16.370403   | 17.366007   | 24.84192    | 7.37129     | 2.066598    |

| PARAFAC Sample Number | Removed (X = Yes) | Fluorescence Index | Freshness Index | Humification Index | Peak A (RU) | Peak B (RU) | Peak T (RU) | Peak C (RU) | Peak M (RU) |
|-----------------------|-------------------|--------------------|-----------------|--------------------|-------------|-------------|-------------|-------------|-------------|
| 39                    |                   | 2.655337           | 0.949342        | 3.531216           | 4.073054    | 1.441568    | 2.177139    | 1.485321    | 0.741963    |
| 40                    |                   | 2.181284           | 0.909519        | 9.055671           | 20.712885   | 4.000695    | 4.367683    | 10.711467   | 5.716233    |
| 41                    |                   | 1.694461           | 1.167015        | 1.214192           | 9.038807    | 17.542165   | 23.083357   | 3.800083    | 2.915269    |
| 42                    |                   | 1.976779           | 1.228333        | 0.327972           | 10.443898   | 20.719786   | 32.300018   | 1.913383    | 2.932209    |
| 43                    | X                 | 2.074522           | 0.671898        | 0.931301           | 13.240333   | 23.310365   | 26.194115   | 5.264843    | 1.995641    |
| 44                    |                   | 1.460829           | 1.303643        | 1.282322           | 14.50493    | 19.294684   | 24.763444   | 6.676075    | 3.128816    |
| 45                    |                   | 1.700482           | 1.043622        | 1.016079           | 15.637635   | 24.675149   | 32.651508   | 6.916274    | 2.485043    |
| 46                    |                   | 1.754811           | 1.319794        | 0.405506           | 5.658636    | 14.467077   | 18.915141   | 1.346606    | 4.084974    |
| 47                    | X                 | 1.985064           | 1.178375        | 0.306159           | 12.121141   | 29.163735   | 32.058044   | 2.2214      | 2.746604    |
| 48                    | X                 | 1.720288           | 0.977306        | 1.421218           | 14.325617   | 19.004264   | 21.325638   | 6.624618    | 2.228335    |
| 49                    |                   | 1.567602           | 0.889774        | 0.219426           | 5.195468    | 14.170812   | 18.370223   | 1.039044    | 1.176185    |
| 50                    |                   | 2.347797           | 0.586734        | 1.49802            | 19.421971   | 17.717291   | 31.201796   | 9.67023     | 1.326713    |
| 51                    |                   | 2.252893           | 1.314898        | 0.526869           | 12.30196    | 33.422581   | 29.193613   | 3.222648    | 4.420878    |
| 52                    |                   | 2.044245           | 0.900296        | 1.330642           | 15.012494   | 21.96419    | 22.634988   | 6.833625    | 2.368621    |
| 53                    |                   | 1.926524           | 0.938839        | 1.177647           | 14.892316   | 18.387112   | 25.944469   | 5.437538    | 1.48661     |
| 54                    |                   | 1.716973           | 0.795286        | 0.748291           | 3.21922     | 11.921472   | 6.513842    | 2.018343    | 3.340377    |
| 55                    | X                 | 1.768023           | 0.841004        | 1.093991           | 2.493892    | 6.343279    | 4.362971    | 1.90975     | 2.659398    |
| 56                    |                   | 1.800487           | 0.78464         | 0.742587           | 2.959185    | 11.020577   | 6.108061    | 1.884574    | 3.127525    |
| 57                    | X                 | 1.837185           | 0.827516        | 1.138076           | 2.545656    | 5.468768    | 4.293661    | 1.895513    | 2.635003    |
| 58                    |                   | 1.784086           | 0.802904        | 0.732137           | 3.131324    | 11.937918   | 6.538082    | 1.963257    | 3.332088    |
| 59                    | X                 | 1.828139           | 0.836378        | 1.111265           | 2.678904    | 6.422616    | 4.589854    | 2.000277    | 2.786817    |
| 60                    |                   | 1.820251           | 0.766302        | 0.837699           | 3.189397    | 11.10262    | 6.180349    | 2.037776    | 3.330666    |
| 61                    |                   | 1.829475           | 0.801193        | 1.116511           | 2.642232    | 7.005682    | 4.56788     | 2.048232    | 2.941774    |
| 62                    |                   | 1.819632           | 0.787267        | 0.823006           | 2.812842    | 9.902221    | 5.630146    | 1.835493    | 2.96432     |
| 63                    |                   | 1.851977           | 0.828559        | 1.180753           | 2.609088    | 5.32188     | 4.196013    | 2.00162     | 2.804786    |
| 64                    |                   | 1.809508           | 0.775177        | 0.797187           | 2.888509    | 10.81713    | 5.862841    | 1.846785    | 3.064493    |
| 65                    |                   | 1.861674           | 0.781727        | 1.156916           | 2.643752    | 6.401954    | 4.356083    | 1.968351    | 2.829077    |
| 66                    | X                 | 0.671454           | 4.618685        | 2.706073           | 0.029255    | 0           | 0           | 0.004231    | 0.005606    |
| 67                    |                   | 1.833469           | 0.739214        | 1.210559           | 2.578246    | 7.1584      | 4.069204    | 1.810763    | 2.87364     |
| 68                    |                   | 1.792108           | 0.78028         | 0.793088           | 3.3578      | 12.828563   | 6.701809    | 1.997085    | 3.328232    |
| 69                    | X                 | 1.797324           | 0.787597        | 0.804061           | 3.088288    | 11.888393   | 6.251381    | 1.913881    | 3.135054    |
| 70                    | X                 | 1.850376           | 0.73692         | 1.246424           | 2.812766    | 6.574629    | 4.309988    | 2.065454    | 3.14921     |
| 71                    | X                 | 1.763691           | 0.792411        | 0.749952           | 3.045635    | 12.468874   | 6.240404    | 1.90154     | 3.002529    |
| 72                    | X                 | 1.790158           | 1.911133        | -                  | 0.355996    | 0           | 0           | 0.388137    | 0.371211    |
| 73                    | X                 | 1.834655           | 1.717667        | 413.001812         | 0.397398    | 0           | 0           | 0.414714    | 0.399459    |
| 74                    | X                 | 1.798447           | 1.789169        | 114.402776         | 0.407668    | 0           | 0           | 0.427147    | 0.436201    |
| 75                    | X                 | 1.807353           | 0.849704        | 1.0394             | 2.416188    | 6.401703    | 4.25823     | 1.823505    | 2.484726    |
| 76                    |                   | 1.587151           | 0.910532        | 0.784806           | 2.9416      | 8.354577    | 6.090023    | 1.630558    | 2.684885    |
| 77                    | X                 | 1.822315           | 0.852699        | 1.071819           | 2.475524    | 6.127725    | 4.133919    | 1.811359    | 2.435533    |
| 78                    |                   | 1.722146           | 0.888542        | 0.813685           | 2.735367    | 8.84506     | 5.139707    | 1.648905    | 2.604184    |

| PARAFAC Sample Number | Removed (X = Yes) | Fluorescence Index | Freshness Index | Humification Index | Peak A (RU) | Peak B (RU) | Peak T (RU) | Peak C (RU) | Peak M (RU) |
|-----------------------|-------------------|--------------------|-----------------|--------------------|-------------|-------------|-------------|-------------|-------------|
| 79                    | X                 | 1.76676            | 0.831964        | 1.098433           | 2.485575    | 6.454524    | 4.390682    | 1.851727    | 2.613126    |
| 80                    |                   | 2.367295           | 0.665792        | 0.562355           | 5.019205    | 9.971376    | 9.633949    | 6.691678    | 5.997495    |
| 81                    |                   | 2.52702            | 0.531724        | 1.203806           | 4.104255    | 4.513943    | 6.747961    | 7.850741    | 6.903158    |
| 82                    |                   | 2.201293           | 0.62771         | 1.147245           | 3.980455    | 4.617815    | 6.241832    | 4.86779     | 4.62311     |
| 83                    |                   | 2.193335           | 0.642068        | 0.525168           | 5.23611     | 10.40369    | 9.549578    | 5.948727    | 5.319659    |
| 84                    |                   | 2.33146            | 0.647593        | 0.864802           | 4.412794    | 7.187111    | 8.884295    | 5.707402    | 5.13879     |
| 85                    |                   | 2.155944           | 0.644862        | 0.7136             | 4.629425    | 8.143218    | 9.25533     | 5.784889    | 5.206915    |
| 86                    |                   | 2.42909            | 0.56161         | 1.088799           | 3.976354    | 4.165015    | 6.654151    | 7.181551    | 6.504302    |
| 87                    |                   | 2.322644           | 0.648073        | 0.878068           | 4.281607    | 7.002029    | 9.075292    | 5.501445    | 4.848514    |
| 88                    |                   | 2.3219             | 0.709441        | 0.29616            | 4.797122    | 15.024583   | 9.602996    | 4.965019    | 4.656057    |
| 89                    |                   | 2.075742           | 0.614702        | 0.484542           | 4.313104    | 9.775438    | 8.231194    | 5.496021    | 4.855949    |
| 90                    |                   | 2.320766           | 0.675441        | 0.475251           | 4.665634    | 11.238205   | 10.137838   | 5.401911    | 4.706866    |
| 91                    |                   | 2.309921           | 0.614431        | 0.900843           | 4.186282    | 6.181791    | 8.385738    | 6.145292    | 6.29465     |
| 92                    |                   | 2.403562           | 0.546249        | 1.046123           | 4.118992    | 5.003657    | 6.813583    | 7.002485    | 6.261715    |
| 93                    |                   | 2.0637             | 0.643433        | 1.230317           | 4.750816    | 5.423897    | 7.522103    | 6.176487    | 6.138966    |
| 94                    |                   | 2.126242           | 0.736414        | 1.10099            | 4.296893    | 4.217182    | 7.340211    | 4.100143    | 4.891968    |
| 95                    | X                 | 2.380331           | 0.569265        | 0.977921           | 4.042068    | 5.435695    | 7.614388    | 6.756076    | 6.357323    |
| 96                    |                   | 2.022978           | 0.729931        | 0.872394           | 5.011777    | 7.370341    | 9.55662     | 5.702684    | 6.609958    |
| 97                    |                   | 2.33393            | 0.58149         | 1.076893           | 5.036447    | 5.956869    | 7.793557    | 6.617598    | 6.69655     |
| 98                    |                   | 2.326823           | 0.575114        | 1.075951           | 4.916754    | 5.596838    | 7.486843    | 7.017694    | 6.858455    |
| 99                    |                   | 2.259026           | 0.619131        | 0.423957           | 4.638662    | 11.865726   | 9.689994    | 6.501608    | 5.514218    |
| 100                   |                   | 2.288661           | 0.627197        | 0.571262           | 5.01014     | 9.4591      | 9.44427     | 6.462984    | 5.596782    |
| 101                   |                   | 2.341406           | 0.60025         | 1.041446           | 4.085365    | 5.33746     | 7.663466    | 7.009392    | 6.278764    |
| 102                   |                   | 2.232039           | 0.632257        | 1.24485            | 4.975684    | 6.591206    | 9.696715    | 6.440552    | 5.98147     |
| 103                   |                   | 2.443112           | 0.662284        | 1.170168           | 4.545438    | 7.031487    | 9.066235    | 6.420802    | 5.54824     |
| 104                   |                   | 2.286992           | 0.602987        | 1.229542           | 4.627819    | 5.797304    | 8.687176    | 6.273152    | 5.625429    |
| 105                   |                   | 2.223223           | 0.584184        | 1.037526           | 5.727631    | 7.488252    | 10.937186   | 8.088177    | 6.697463    |
| 106                   |                   | 2.351565           | 0.595451        | 1.184182           | 4.916688    | 6.814867    | 9.623555    | 6.93707     | 6.159395    |
| 107                   |                   | 2.292129           | 0.589051        | 1.349556           | 5.089266    | 6.107296    | 8.47733     | 7.312084    | 6.657997    |
| 108                   |                   | 2.692192           | 0.559003        | 1.33337            | 5.036022    | 5.600644    | 8.064931    | 8.253191    | 6.769981    |
| 109                   |                   | 2.193849           | 0.586304        | 1.211594           | 4.968086    | 6.425685    | 9.0418      | 6.239301    | 5.830847    |
| 110                   |                   | 2.247153           | 0.619832        | 1.280031           | 4.691468    | 5.589277    | 7.759675    | 5.559428    | 5.262286    |
| 111                   |                   | 2.272136           | 0.638694        | 1.103254           | 4.459561    | 6.312888    | 9.259632    | 5.984127    | 5.282065    |
| 112                   |                   | 2.137078           | 0.617865        | 1.13728            | 4.601185    | 6.391658    | 8.858288    | 5.700972    | 5.3185      |
| 113                   |                   | 2.173359           | 0.622332        | 1.065297           | 4.542287    | 7.311736    | 9.89254     | 5.372596    | 5.256378    |
| 114                   |                   | 2.110445           | 0.777099        | 1.010204           | 4.672782    | 6.048111    | 9.413271    | 4.537998    | 4.920255    |
| 115                   |                   | 2.315435           | 0.561721        | 1.306266           | 4.955959    | 6.096132    | 8.685061    | 6.874741    | 6.180743    |
| 116                   |                   | 2.255163           | 0.577401        | 1.325755           | 4.686281    | 5.207349    | 7.418348    | 6.915821    | 5.768599    |
| 117                   |                   | 2.025508           | 0.649964        | 0.959256           | 4.698343    | 8.183072    | 11.228523   | 5.493326    | 5.103908    |
| 118                   |                   | 2.08276            | 0.604129        | 1.269751           | 5.262822    | 6.159507    | 8.245009    | 5.852079    | 5.289355    |

| <b>PARAFAC<br/>Sample<br/>Number</b> | <b>Removed<br/>(X =<br/>Yes)</b> | <b>Fluorescence<br/>Index</b> | <b>Freshness<br/>Index</b> | <b>Humification<br/>Index</b> | <b>Peak A<br/>(RU)</b> | <b>Peak B<br/>(RU)</b> | <b>Peak T<br/>(RU)</b> | <b>Peak C<br/>(RU)</b> | <b>Peak M<br/>(RU)</b> |
|--------------------------------------|----------------------------------|-------------------------------|----------------------------|-------------------------------|------------------------|------------------------|------------------------|------------------------|------------------------|
| 119                                  |                                  | 2.244255                      | 0.636654                   | 0.966147                      | 5.209248               | 9.412411               | 12.528082              | 6.471646               | 5.8243                 |
| 120                                  |                                  | 2.126962                      | 0.656847                   | 1.003883                      | 4.757883               | 8.531699               | 11.295941              | 5.412813               | 5.213083               |
| 121                                  |                                  | 2.323051                      | 0.585688                   | 1.230889                      | 5.058701               | 5.969694               | 8.382127               | 6.164802               | 5.642687               |
| 122                                  |                                  | 2.361017                      | 0.54153                    | 1.410283                      | 4.91525                | 5.224118               | 7.299608               | 6.903623               | 5.80899                |
| 123                                  |                                  | 2.291297                      | 0.547375                   | 1.288489                      | 4.3487                 | 4.734244               | 6.837907               | 6.186129               | 5.288832               |
| 124                                  |                                  | 1.981596                      | 0.865518                   | 0.81633                       | 4.651278               | 7.843403               | 12.071523              | 3.788418               | 5.134165               |
| 125                                  |                                  | 2.382172                      | 0.539484                   | 1.396337                      | 4.573362               | 4.504666               | 6.10282                | 5.603704               | 4.9918                 |
| 126                                  |                                  | 2.0502                        | 0.783243                   | 0.92321                       | 4.128637               | 5.920131               | 9.525229               | 3.903575               | 4.506019               |
| 127                                  |                                  | 1.997379                      | 0.636891                   | 0.883857                      | 4.405681               | 6.790824               | 9.377479               | 4.768503               | 4.938404               |
| 128                                  |                                  | 2.260312                      | 0.575125                   | 1.227425                      | 4.351104               | 5.223034               | 7.219252               | 5.094581               | 4.73433                |



**Table S5.** Loadings and relative amounts of each component in the 128 samples used in the PARAFAC model. (No data available for samples removed from the model).

| PARAFAC Sample Number | Fmax1 | Fmax2 | Fmax3 | sum  | %C1   | %C2   | %C3   |
|-----------------------|-------|-------|-------|------|-------|-------|-------|
| 1                     | 0.19  | 0.29  | 0.03  | 0.51 | 37.7% | 56.4% | 5.8%  |
| 2                     | 0.17  | 0.28  | 0.03  | 0.48 | 35.4% | 57.5% | 7.1%  |
| 3                     | 0.21  | 0.37  | 0.04  | 0.62 | 33.9% | 59.5% | 6.6%  |
| 4                     | 0.29  | 0.39  | 0.05  | 0.73 | 39.6% | 53.8% | 6.6%  |
| 5                     | 0.33  | 0.44  | 0.05  | 0.83 | 40.2% | 53.2% | 6.5%  |
| 6                     | 0.46  | 0.80  | 0.10  | 1.36 | 34.1% | 58.4% | 7.5%  |
| 7                     | 0.67  | 0.59  | 0.08  | 1.33 | 50.2% | 44.1% | 5.7%  |
| 8                     | 0.71  | 0.47  | 0.09  | 1.27 | 55.7% | 37.1% | 7.1%  |
| 9                     | 0.81  | 0.86  | 0.12  | 1.79 | 45.4% | 48.1% | 6.5%  |
| 10                    | 0.86  | 0.85  | 0.14  | 1.84 | 46.4% | 46.0% | 7.6%  |
| 11                    | 0.86  | 0.89  | 0.14  | 1.89 | 45.4% | 47.2% | 7.4%  |
| 12                    | 0.84  | 0.81  | 0.13  | 1.77 | 47.1% | 45.7% | 7.3%  |
| 13                    | 0.88  | 0.88  | 0.14  | 1.89 | 46.3% | 46.5% | 7.2%  |
| 14                    | 0.32  | 0.87  | 0.07  | 1.27 | 25.6% | 68.6% | 5.8%  |
| 15                    | 0.92  | 0.61  | 0.12  | 1.65 | 55.8% | 37.0% | 7.3%  |
| 16                    |       |       |       |      |       |       |       |
| 17                    | 0.25  | 0.28  | 0.87  | 1.40 | 17.7% | 20.0% | 62.4% |
| 18                    | 0.11  | 0.26  | 0.85  | 1.22 | 9.1%  | 21.0% | 69.9% |
| 19                    | 0.23  | 0.46  | 0.85  | 1.54 | 14.8% | 29.7% | 55.5% |
| 20                    | 0.13  | 0.08  | 0.93  | 1.14 | 11.3% | 6.9%  | 81.7% |
| 21                    | 0.24  | 0.29  | 0.87  | 1.40 | 16.8% | 20.9% | 62.3% |
| 22                    | 0.09  | 0.88  | 0.41  | 1.38 | 6.4%  | 63.8% | 29.7% |
| 23                    | 0.08  | 0.30  | 0.92  | 1.30 | 6.5%  | 23.1% | 70.4% |
| 24                    | 0.09  | 0.08  | 0.95  | 1.13 | 8.2%  | 7.4%  | 84.4% |
| 25                    | 0.22  | 0.28  | 0.87  | 1.37 | 16.0% | 20.4% | 63.5% |
| 26                    | 0.06  | 0.80  | 0.28  | 1.14 | 5.2%  | 70.3% | 24.5% |
| 27                    | 0.08  | 0.13  | 0.89  | 1.10 | 6.8%  | 12.2% | 80.9% |
| 28                    |       |       |       |      |       |       |       |
| 29                    | 0.17  | 0.28  | 0.87  | 1.32 | 13.0% | 20.9% | 66.1% |
| 30                    | 0.17  | 0.61  | 0.85  | 1.63 | 10.3% | 37.5% | 52.2% |
| 31                    | 0.04  | 0.83  | 0.23  | 1.10 | 3.8%  | 75.5% | 20.6% |
| 32                    |       |       |       |      |       |       |       |
| 33                    | 0.12  | 0.16  | 0.89  | 1.17 | 10.4% | 14.0% | 75.6% |
| 34                    | 0.04  | 0.74  | 0.27  | 1.05 | 3.8%  | 70.6% | 25.6% |
| 35                    |       |       |       |      |       |       |       |
| 36                    | 0.18  | 0.87  | 0.62  | 1.67 | 10.5% | 52.3% | 37.2% |
| 37                    | 0.07  | 0.85  | 0.17  | 1.09 | 6.2%  | 78.1% | 15.8% |
| 38                    | 0.05  | 0.60  | 0.94  | 1.58 | 3.0%  | 37.7% | 59.4% |
| 39                    | 0.15  | 0.30  | 0.90  | 1.34 | 11.0% | 22.0% | 67.0% |
| 40                    | 0.23  | 0.11  | 1.01  | 1.36 | 17.3% | 8.4%  | 74.3% |
| 41                    | 0.05  | 0.58  | 0.51  | 1.13 | 4.4%  | 50.8% | 44.9% |
| 42                    | 0.06  | 0.90  | 0.14  | 1.10 | 5.8%  | 81.1% | 13.0% |
| 43                    |       |       |       |      |       |       |       |
| 44                    | 0.00  | 0.60  | 1.00  | 1.60 | 0.0%  | 37.3% | 62.7% |
| 45                    | 0.00  | 0.76  | 0.99  | 1.75 | 0.0%  | 43.5% | 56.5% |
| 46                    | 0.13  | 0.90  | 0.15  | 1.18 | 11.1% | 75.8% | 13.1% |
| 47                    |       |       |       |      |       |       |       |

| PARAFAC Sample Number | Fmax1 | Fmax2 | Fmax3 | sum  | %C1   | %C2   | %C3   |
|-----------------------|-------|-------|-------|------|-------|-------|-------|
| 48                    |       |       |       |      |       |       |       |
| 49                    | 0.05  | 0.87  | 0.04  | 0.96 | 5.3%  | 90.6% | 4.1%  |
| 50                    | 0.00  | 0.48  | 0.82  | 1.30 | 0.0%  | 37.1% | 62.9% |
| 51                    | 0.09  | 0.83  | 0.31  | 1.23 | 7.6%  | 67.1% | 25.3% |
| 52                    | 0.05  | 0.64  | 0.97  | 1.65 | 2.9%  | 38.6% | 58.5% |
| 53                    | 0.00  | 0.64  | 0.94  | 1.58 | 0.0%  | 40.7% | 59.3% |
| 54                    | 0.34  | 0.61  | 0.05  | 1.01 | 34.2% | 60.6% | 5.3%  |
| 55                    |       |       |       |      |       |       |       |
| 56                    | 0.34  | 0.61  | 0.06  | 1.02 | 33.9% | 60.3% | 5.8%  |
| 57                    |       |       |       |      |       |       |       |
| 58                    | 0.34  | 0.61  | 0.06  | 1.00 | 33.6% | 60.8% | 5.6%  |
| 59                    |       |       |       |      |       |       |       |
| 60                    | 0.39  | 0.63  | 0.07  | 1.08 | 35.9% | 57.9% | 6.1%  |
| 61                    | 0.61  | 0.77  | 0.12  | 1.49 | 40.7% | 51.6% | 7.7%  |
| 62                    |       |       |       |      |       |       |       |
| 63                    | 0.77  | 0.93  | 0.12  | 1.82 | 42.2% | 51.0% | 6.7%  |
| 64                    | 0.35  | 0.60  | 0.05  | 1.00 | 35.0% | 60.2% | 4.7%  |
| 65                    | 0.63  | 0.78  | 0.10  | 1.51 | 41.8% | 51.6% | 6.6%  |
| 66                    |       |       |       |      |       |       |       |
| 67                    | 0.57  | 0.67  | 0.11  | 1.34 | 42.2% | 49.8% | 8.0%  |
| 68                    | 0.33  | 0.58  | 0.06  | 0.96 | 34.0% | 60.2% | 5.8%  |
| 69                    |       |       |       |      |       |       |       |
| 70                    |       |       |       |      |       |       |       |
| 71                    |       |       |       |      |       |       |       |
| 72                    |       |       |       |      |       |       |       |
| 73                    |       |       |       |      |       |       |       |
| 74                    |       |       |       |      |       |       |       |
| 75                    |       |       |       |      |       |       |       |
| 76                    | 0.43  | 0.81  | 0.08  | 1.31 | 32.5% | 61.7% | 5.8%  |
| 77                    |       |       |       |      |       |       |       |
| 78                    | 0.37  | 0.64  | 0.06  | 1.07 | 34.6% | 59.7% | 5.7%  |
| 79                    |       |       |       |      |       |       |       |
| 80                    | 0.38  | 0.47  | 0.06  | 0.91 | 41.4% | 52.2% | 6.4%  |
| 81                    | 0.73  | 0.45  | 0.08  | 1.27 | 57.7% | 35.8% | 6.5%  |
| 82                    | 0.85  | 0.75  | 0.13  | 1.73 | 49.0% | 43.4% | 7.5%  |
| 83                    | 0.28  | 0.38  | 0.05  | 0.71 | 38.8% | 54.0% | 7.2%  |
| 84                    | 0.78  | 0.88  | 0.11  | 1.76 | 44.3% | 49.7% | 6.0%  |
| 85                    | 0.59  | 0.72  | 0.09  | 1.40 | 42.3% | 51.5% | 6.2%  |
| 86                    | 0.69  | 0.49  | 0.07  | 1.25 | 55.3% | 39.0% | 5.6%  |
| 87                    | 0.80  | 0.93  | 0.10  | 1.83 | 43.6% | 51.0% | 5.4%  |
| 88                    | 0.12  | 0.25  | 0.02  | 0.39 | 31.0% | 64.2% | 4.8%  |
| 89                    | 0.28  | 0.38  | 0.04  | 0.70 | 39.8% | 53.9% | 6.3%  |
| 90                    | 0.25  | 0.41  | 0.04  | 0.70 | 35.5% | 58.5% | 6.0%  |
| 91                    | 0.70  | 0.64  | 0.07  | 1.41 | 50.1% | 45.1% | 4.8%  |
| 92                    | 0.71  | 0.54  | 0.07  | 1.32 | 53.7% | 41.0% | 5.3%  |
| 93                    | 0.70  | 0.59  | 0.12  | 1.40 | 49.8% | 41.9% | 8.3%  |
| 94                    | 0.69  | 0.61  | 0.07  | 1.37 | 50.5% | 44.3% | 5.1%  |
| 95                    | 0.63  | 0.65  | 0.12  | 1.40 | 44.8% | 46.6% | 8.5%  |
| 96                    | 0.65  | 0.72  | 0.10  | 1.48 | 44.3% | 48.7% | 7.0%  |
| 97                    | 0.76  | 0.64  | 0.08  | 1.49 | 51.4% | 43.1% | 5.4%  |
| 98                    | 0.75  | 0.59  | 0.07  | 1.41 | 53.1% | 42.0% | 4.9%  |

| PARAFAC<br>Sample<br>Number | Fmax1 | Fmax2 | Fmax3 | sum  | %C1   | %C2   | %C3  |
|-----------------------------|-------|-------|-------|------|-------|-------|------|
| 99                          |       |       |       |      |       |       |      |
| 100                         | 0.24  | 0.29  | 0.04  | 0.56 | 42.1% | 50.9% | 7.0% |
| 101                         | 0.67  | 0.56  | 0.09  | 1.31 | 51.1% | 42.3% | 6.6% |
| 102                         | 0.87  | 0.85  | 0.14  | 1.85 | 46.8% | 45.8% | 7.4% |
| 103                         | 0.89  | 0.89  | 0.16  | 1.94 | 46.1% | 45.8% | 8.1% |
| 104                         | 0.91  | 0.84  | 0.15  | 1.90 | 47.7% | 44.3% | 8.0% |
| 105                         | 0.87  | 0.86  | 0.13  | 1.86 | 46.9% | 46.1% | 7.0% |
| 106                         | 0.85  | 0.66  | 0.12  | 1.63 | 52.2% | 40.6% | 7.2% |
| 107                         | 0.93  | 0.67  | 0.10  | 1.71 | 54.6% | 39.4% | 6.1% |
| 108                         | 0.86  | 0.81  | 0.14  | 1.81 | 47.3% | 45.0% | 7.7% |
| 109                         | 0.84  | 0.80  | 0.14  | 1.78 | 47.2% | 44.9% | 7.8% |
| 110                         | 0.80  | 0.73  | 0.14  | 1.67 | 48.0% | 43.6% | 8.4% |
| 111                         | 0.80  | 0.83  | 0.11  | 1.75 | 45.7% | 47.7% | 6.5% |
| 112                         | 0.74  | 0.76  | 0.12  | 1.62 | 45.5% | 47.1% | 7.4% |
| 113                         | 0.79  | 0.91  | 0.14  | 1.85 | 43.0% | 49.5% | 7.6% |
| 114                         | 0.62  | 0.78  | 0.13  | 1.52 | 40.6% | 51.0% | 8.3% |
| 115                         | 0.89  | 0.76  | 0.13  | 1.77 | 50.0% | 42.9% | 7.1% |
| 116                         | 0.93  | 0.71  | 0.12  | 1.75 | 52.8% | 40.5% | 6.7% |
| 117                         | 0.67  | 0.90  | 0.13  | 1.70 | 39.4% | 53.1% | 7.5% |
| 118                         | 0.80  | 0.74  | 0.13  | 1.67 | 47.8% | 44.7% | 7.6% |
| 119                         | 0.70  | 0.90  | 0.11  | 1.70 | 40.9% | 52.7% | 6.4% |
| 120                         | 0.68  | 0.89  | 0.11  | 1.68 | 40.2% | 53.2% | 6.6% |
| 121                         | 0.84  | 0.74  | 0.12  | 1.71 | 49.1% | 43.7% | 7.3% |
| 122                         | 0.85  | 0.62  | 0.12  | 1.59 | 53.6% | 39.2% | 7.3% |
| 123                         | 0.86  | 0.66  | 0.11  | 1.62 | 52.7% | 40.6% | 6.7% |
| 124                         | 0.48  | 0.82  | 0.11  | 1.41 | 34.2% | 58.3% | 7.5% |
| 125                         | 0.78  | 0.57  | 0.10  | 1.46 | 53.7% | 39.3% | 7.0% |
| 126                         | 0.56  | 0.80  | 0.10  | 1.47 | 38.4% | 54.6% | 7.1% |
| 127                         | 0.76  | 0.95  | 0.14  | 1.86 | 41.2% | 51.4% | 7.5% |
| 128                         | 0.83  | 0.77  | 0.11  | 1.71 | 48.7% | 45.0% | 6.3% |

**Table S6.** Calculation of degradation rate coefficients (assuming first order decay) under 100% synthetic wastewater and 50% recirculated treated effluent conditions.

| <b>Parameter</b>                                                | <b>Value</b> |
|-----------------------------------------------------------------|--------------|
| 100% fresh synthetic wastewater                                 |              |
| Average COD concentration, influent                             | 469.5        |
| Average COD concentration, effluent                             | 109.0        |
| Estimated decay rate coefficient, $k_{100}$ ( $\text{h}^{-1}$ ) | 0.041        |
| 50% recirculated effluent                                       |              |
| Average COD concentration, influent                             | 286.7        |
| Average COD concentration, effluent                             | 90.4         |
| Estimated decay rate coefficient, $k_{50}$ ( $\text{h}^{-1}$ )  | 0.032        |
| Reactor hydraulic residence time (HRT, h)                       | 36           |

## Supplementary Figures

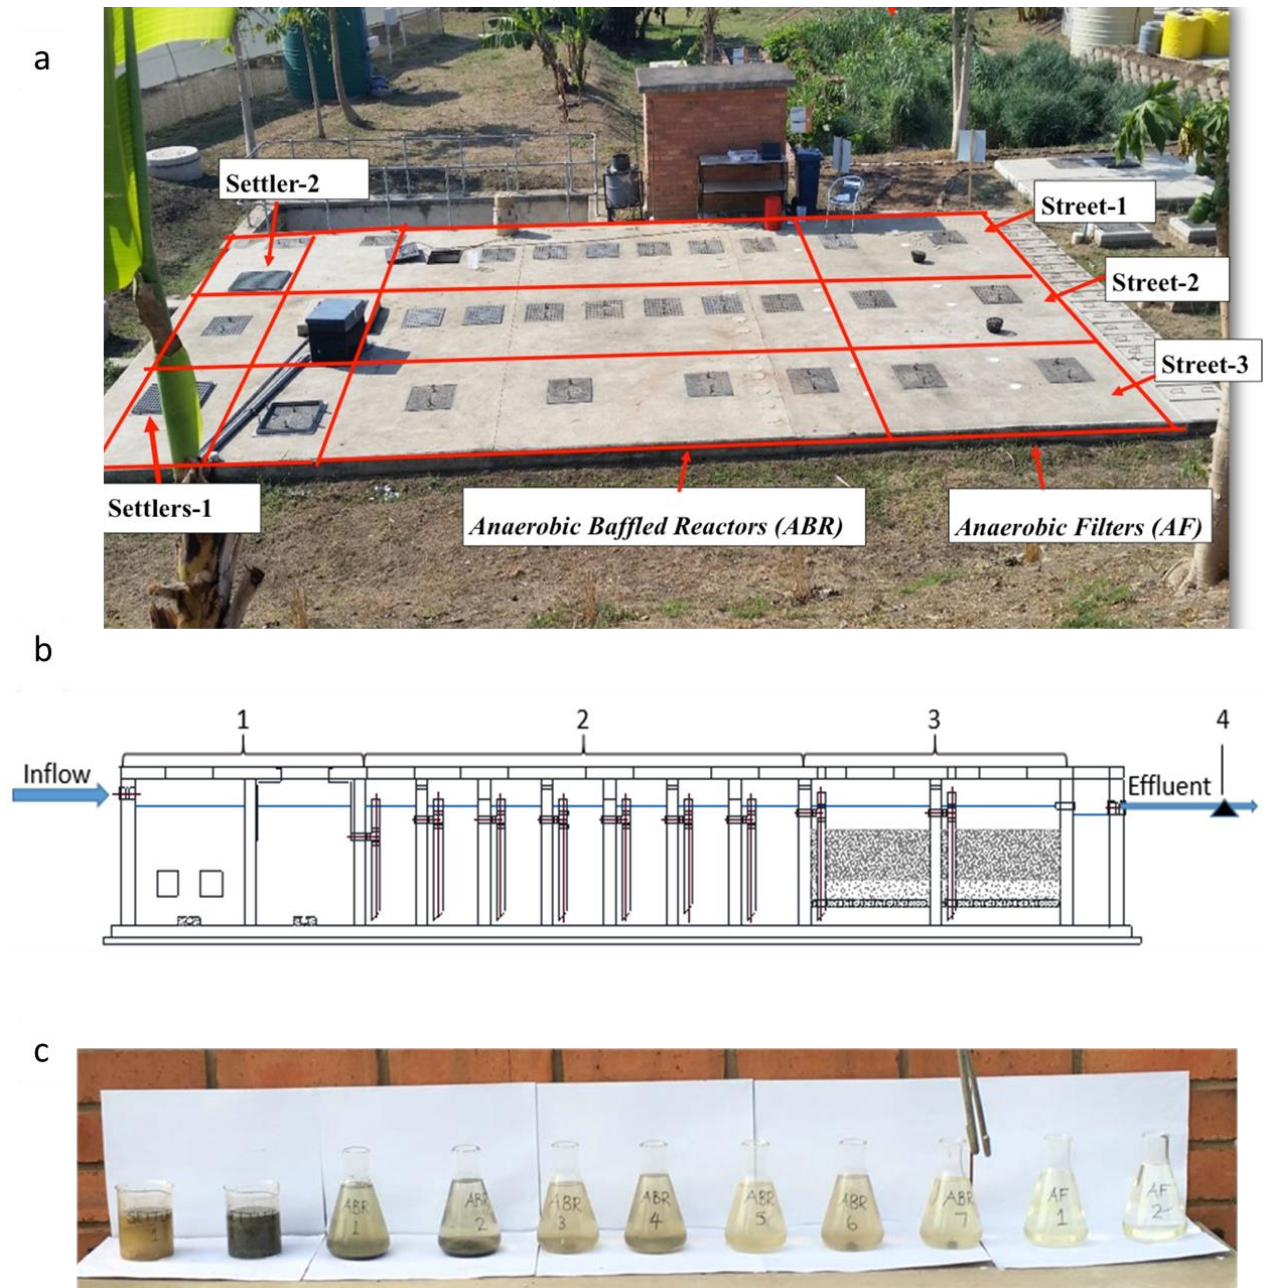

**Supplementary Figure S1.** a) Photograph of decentralized wastewater treatment system in Durban, South Africa, b) cross-sectional side view of the (1) Settling Chamber (2) 7 ABR Chambers (3) 2 AF Chambers (4) Magnetic induction Flow meter (Picture courtesy of BORDA 2011), and c) photograph of flasks containing water from each chamber of the settler-ABR-AF system showing color change from inlet to outlet.

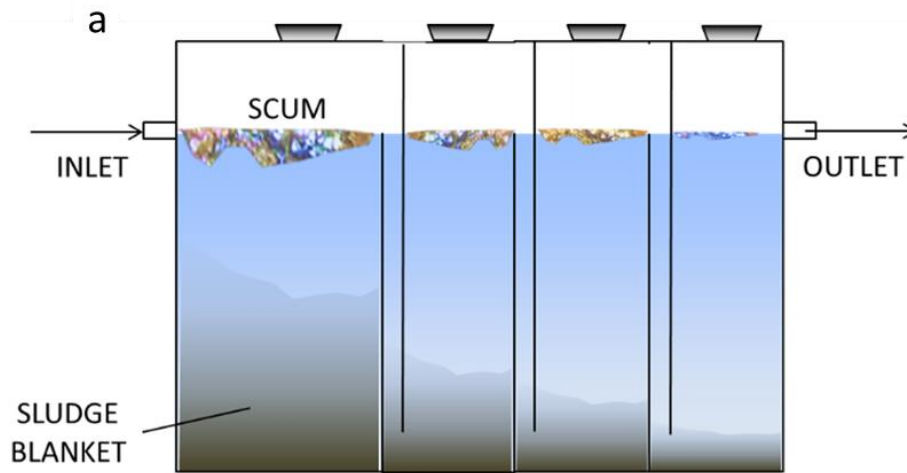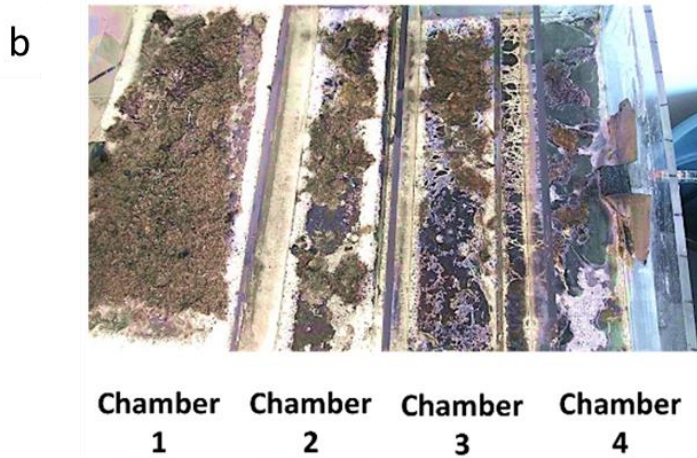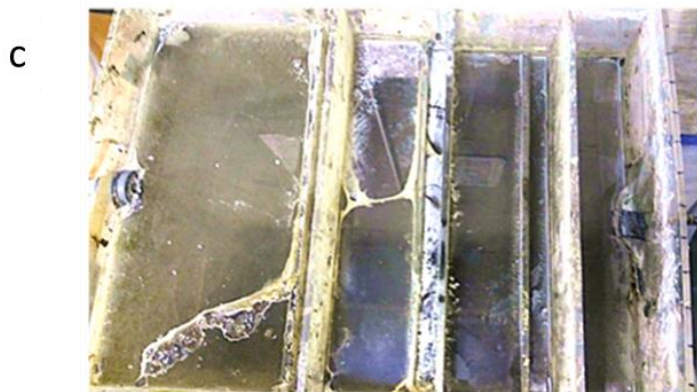

**Supplementary Figure S2.** Schematic showing a) side view of lab-scale ABR and photographs showing top view of scum in four chambers of the ABR under b) fresh wastewater under normal operation and c) 50% recirculated wastewater conditions. Note that scum was not physically removed; the scum dissipated due to recirculation.

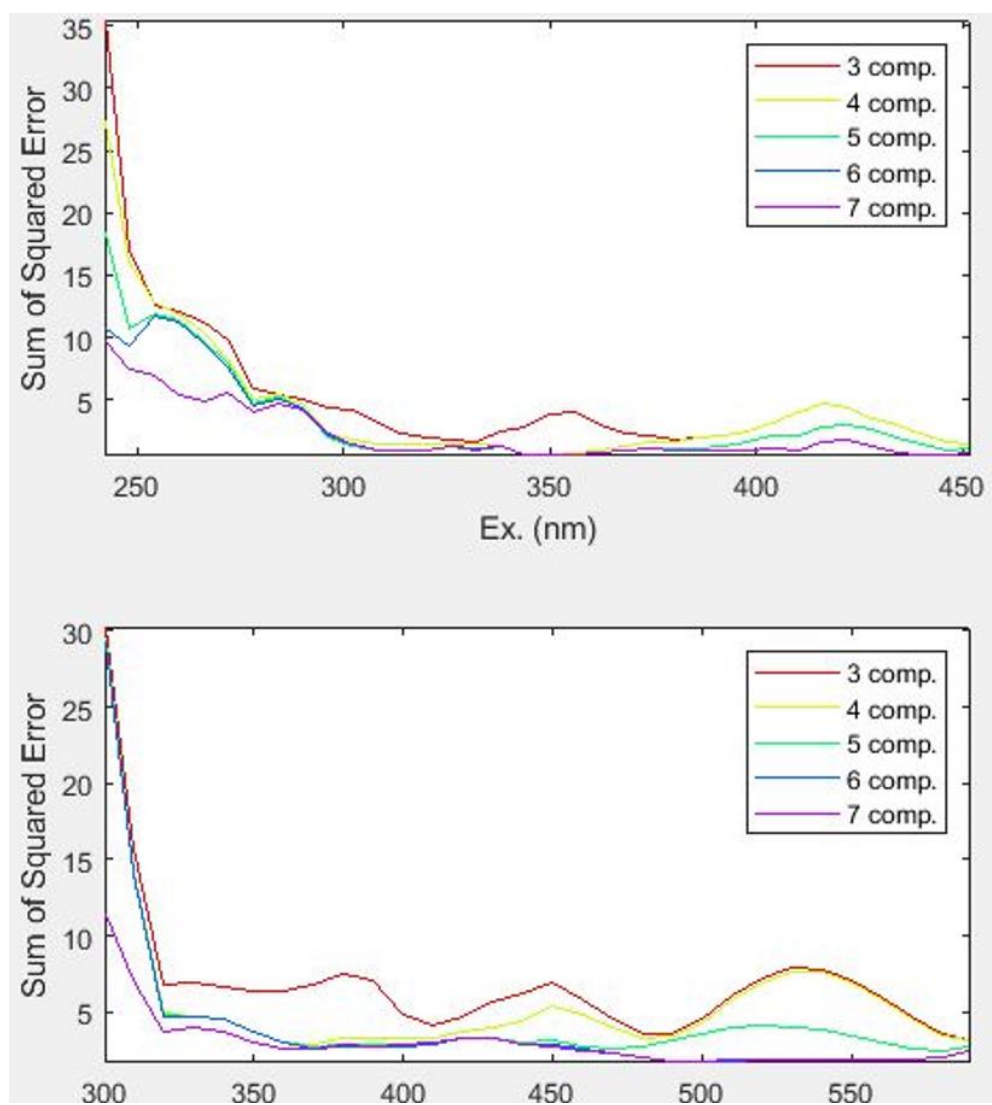

**Figure S3.** Sum of squared error for excitation (top) and emission (bottom) wavelengths in PARAFAC models with 3 to 7 components.



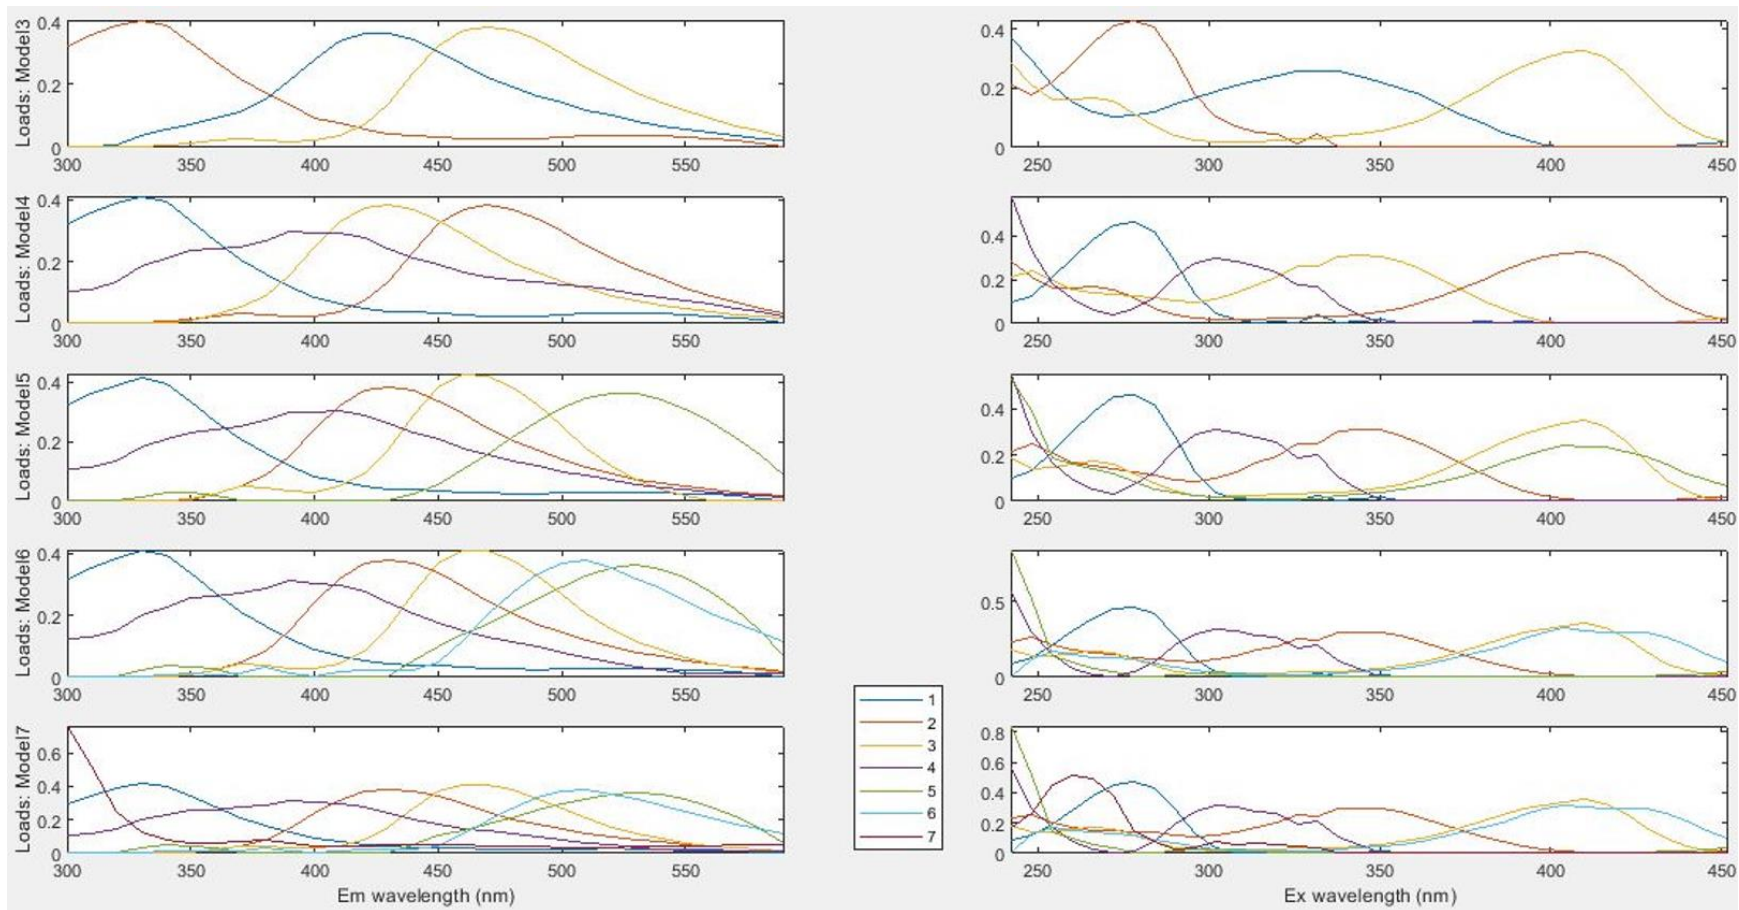

**Figure S4.** Loads for emission (left) and excitation (right) for 3- to 7-component models.



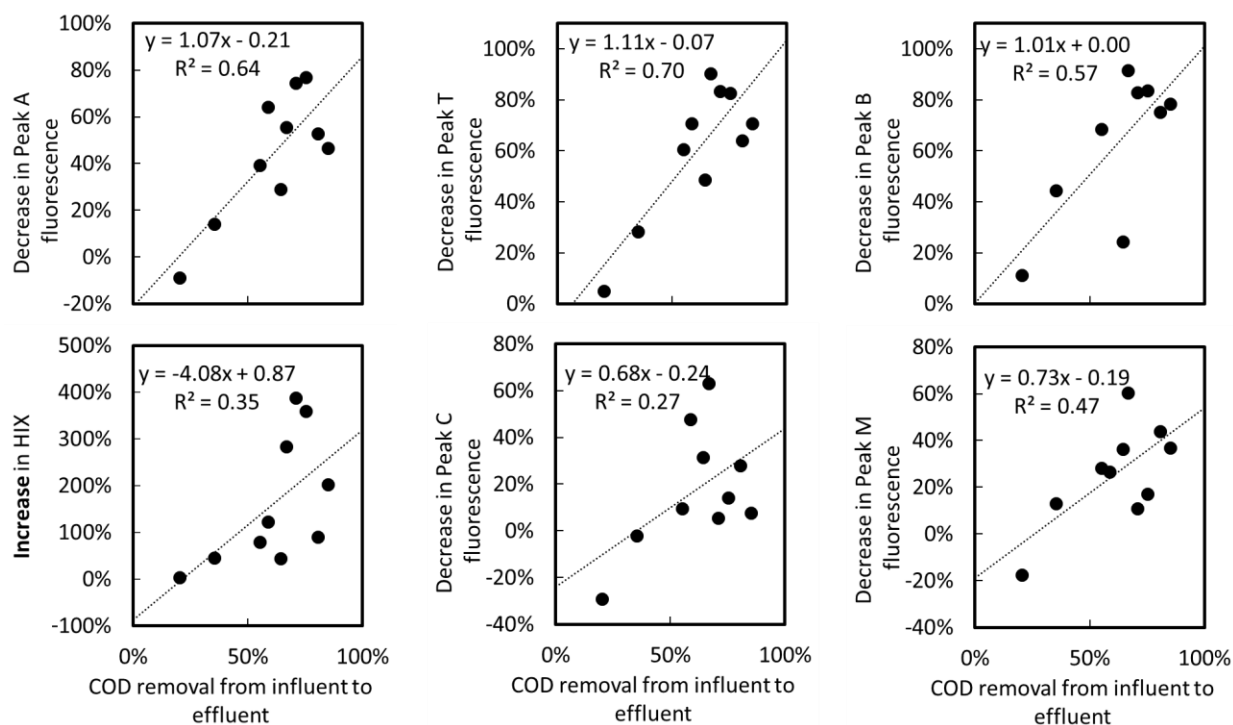

**Figures S5.** Relationships between COD removals and changes in the 5 main fluorescent peaks and HIX from influent to effluent. Each point represents the average removal or increase/decrease for each of the ten treatment scenarios given in Table 1 of the main text. Note that the HIX changes are shown as % increases in HIX from influent to effluent, whereas the peak intensity changes are shown as a % decrease from influent to effluent.

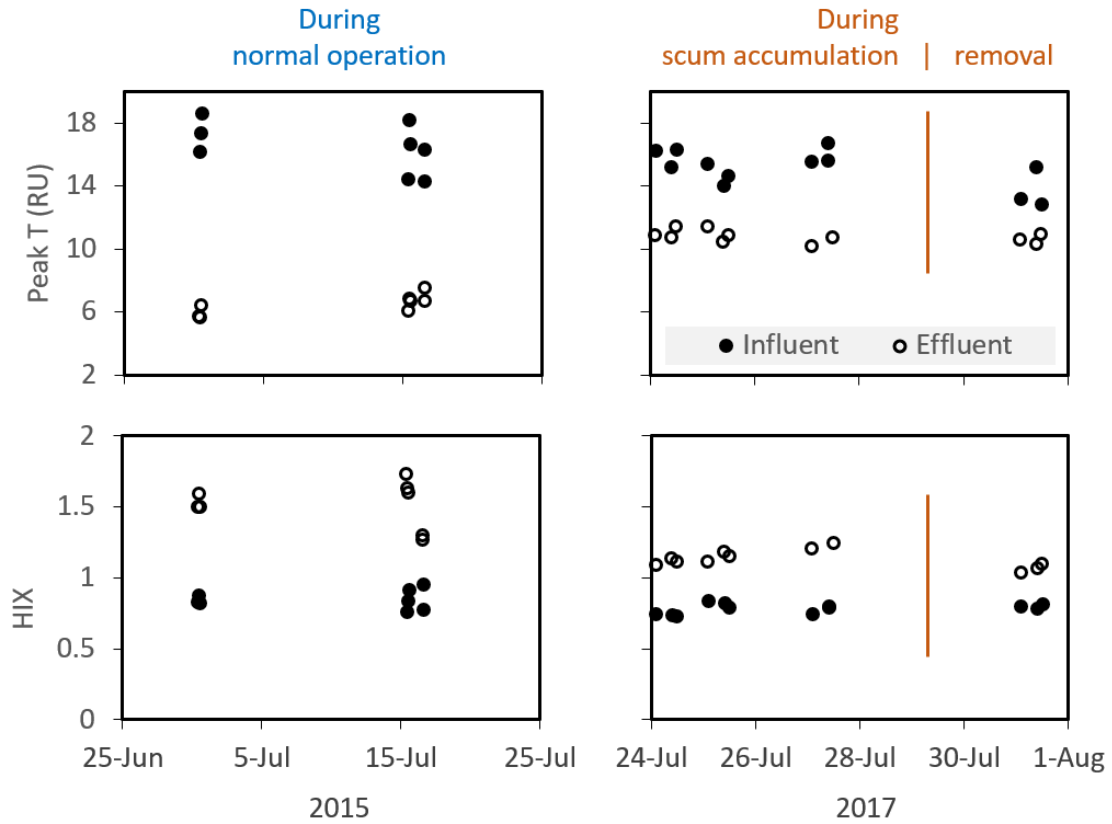

**Figure S6.** Changes in Peak T and HIX in influent (filled circles) and effluent (open circles) in the community-scale ABR in 2015 under normal operation (left) and in 2017 under scum accumulation and removal conditions (right). Effluent Peak T values decrease more and effluent HIX values are higher when the ABR was operating without scum accumulation issues (2015) compared to when scum accumulated to actionable levels (2017).

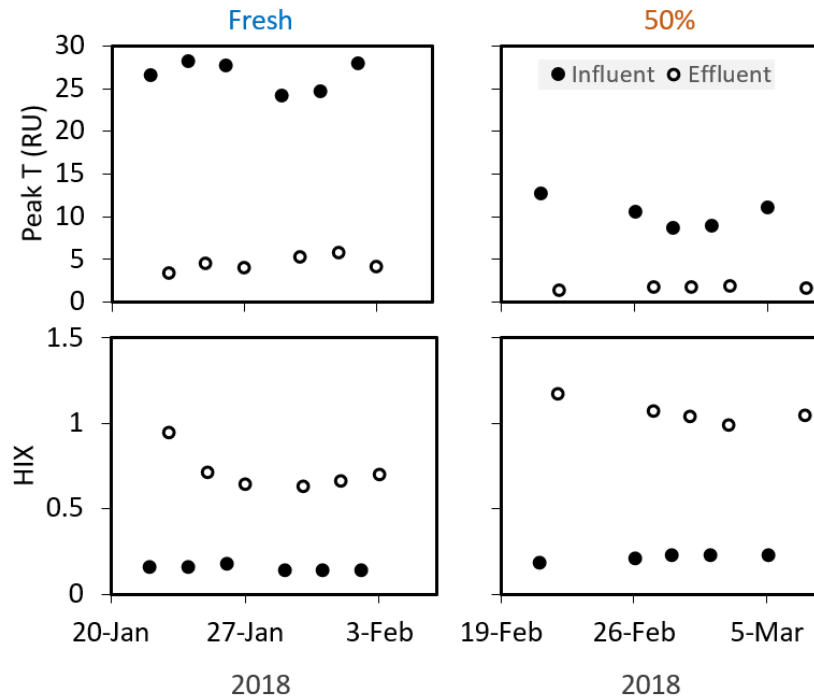

**Figure S7.** Changes in Peak T and HIX in influent (filled circles) and effluent (open circles) in the lab-scale ABR in 2018 under conditions with fresh 100% synthetic wastewater (left) and 50% recirculated effluent mixed with synthetic wastewater (right). Influent becomes more recalcitrant (lower Peak T) when the ABR was fed with 50% recirculated effluent compared to when the ABR was fed with fresh 100% synthetic wastewater, but effluent values are no .
